# Supplementary material for: L-Dopa-Decarboxylase (DDC) Is a Positive Prognosticator for Breast Cancer Patients and Epinephrine Regulates Breast Cancer Cell (MCF7 and T47D) Growth In Vitro According to Their Different Expression of Gi- Protein- Coupled Receptors
Source: PubMed Central journal article supplement (PMC7765554; doi:10.3390/ijms21249565), 2020-12-15
Supplement: ijms-21-09565-s001.pdf [file ijms-21-09565-s001.pdf]

| patient no. | T  | N  | M | G | Her 2 | ER  | PR  | Luminal | TAAR1 (nuclear) |     | DDC (cytoplasm) |      | patient no. | T  | N  | M | G   | Her 2 | ER  | PR  | Luminal | TAAR1 (nuclear) |     | DDC (cytoplasm) |     | patient no. | T  | N  | M   | G   | Her 2 | ER  | PR  | Luminal | TAAR1 (nuclear) |     | DDC (cytoplasm) |      |
|-------------|----|----|---|---|-------|-----|-----|---------|-----------------|-----|-----------------|------|-------------|----|----|---|-----|-------|-----|-----|---------|-----------------|-----|-----------------|-----|-------------|----|----|-----|-----|-------|-----|-----|---------|-----------------|-----|-----------------|------|
|             |    |    |   |   |       |     |     |         | Intensity       | IRS | Intensity       | IRS  |             |    |    |   |     |       |     |     |         | Intensity       | IRS | Intensity       | IRS |             |    |    |     |     |       |     |     |         | Intensity       | IRS | Intensity       | IRS  |
| 1           | 1b | x  | x | 3 | pos   | pos | neg | B       | 0               | 0   | 2               | 8    | 101         | 1c | 0  | x | 2   | neg   | pos | pos | B       | 3               | 6   | 1               | 3   | 201         | 1c | 0  | x   | neg | pos   | pos | B   | 3       | 3               | 1   | 3               |      |
| 2           | 1c | 0  | x | 2 | neg   | pos | pos | A       | 0               | 0   | 2               | 8    | 102         | 1c | 0  | x | 3   | neg   | neg | pos | B       | 0               | 0   | 0               | 0   | 202         | 2  | 0  | x   | 3   | neg   | pos | pos | B       | 0               | 0   | 1               | 4    |
| 3           | 1b | 0  | x | 2 | neg   | pos | pos | B       | 0               | 0   | n.a.            | n.a. | 103         | 1b | 0  | x | pos | neg   | neg | A   | 0       | 0               | 2   | 8               | 203 | 2           | 0  | x  | neg | pos | pos   | B   | 0   | 0       | 1               | 4   |                 |      |
| 4           | 1b | 1b | x | 2 | neg   | neg | neg | A       | 0               | 0   | n.a.            | n.a. | 104         | 2  | 1b | x | neg | pos   | neg | A   | 0       | 0               | 1   | 2               | 204 | 2           | 0  | x  | 2   | neg | pos   | pos | B   | 0       | 0               | 1   | 4               |      |
| 5           | 1c | 1b | x | 2 | neg   | pos | neg | B       | 0               | 0   | 3               | 12   | 105         | 2  | 1b | x | 3   | neg   | neg | neg | A       | 0               | 0   | 0               | 0   | 205         | 1c | 0  | x   | 2   | neg   | pos | pos | A       | 3               | 3   | 1               | 4    |
| 6           | 2  | 2  | x | 3 | neg   | pos | pos | A       | 2               | 6   | n.a.            | n.a. | 106         | 1c | 1b | x | neg | pos   | pos | B   | 0       | 0               | 2   | 6               | 206 | 1c          | 0  | x  | neg | neg | pos   | B   | 0   | 0       | 0               | 0   |                 |      |
| 7           | 2  | 1b | x | 2 | neg   | pos | pos | B       | 0               | 0   | 3               | 12   | 107         | 3  | 1b | x | 3   | neg   | pos | neg | B       | 3               | 6   | 0               | 0   | 207         | 2  | 1b | x   | neg | pos   | pos | A   | 3       | 3               | 1   | 3               |      |
| 8           | 1c | 1b | x | 3 | neg   | pos | pos | A       | 0               | 0   | 1               | 4    | 108         | 1b | 1b | x | 2   | neg   | pos | neg | A       | 0               | 0   | 1               | 3   | 208         | 1b | 0  | x   | 2   | neg   | pos | pos | A       | 3               | 6   | 0               | 0    |
| 9           | 2  | 1b | x | 2 | neg   | pos | pos | A       | 0               | 0   | n.a.            | n.a. | 109         | 1c | 1b | x | 2   | neg   | pos | pos | B       | 2               | 4   | 2               | 8   | 209         | 2  | 1b | x   | neg | pos   | neg | B   | 3       | 6               | 0   | 0               |      |
| 10          | 1c | 1b | x | 3 | neg   | pos | neg | A       | 0               | 0   | 3               | 12   | 110         | 2  | 1b | x | 3   | neg   | neg | neg | A       | 2               | 4   | 3               | 12  | 210         | 1c | 0  | x   | neg | pos   | neg | A   | 0       | 0               | 3   | 12              |      |
| 11          | 1c | 0  | x | 2 | neg   | pos | pos | A       | 0               | 0   | n.a.            | n.a. | 111         | 1c | 0  | x | neg | pos   | neg | A   | 0       | 0               | 2   | 8               | 211 | 1b          | 0  | x  | 1   | neg | pos   | neg | A   | 0       | 0               | 0   | 0               |      |
| 12          | 1c | 1b | x | 3 | neg   | pos | pos | B       | 0               | 0   | 1               | 4    | 112         | 1c | 2  | x | 3   | pos   | neg | neg | A       | 2               | 4   | 3               | 12  | 212         | 2  | 0  | x   | 3   | pos   | neg | neg | A       | 3               | 6   | 1               | 4    |
| 13          | 1b | 1b | x | 3 | pos   | pos | pos | A       | 3               | 9   | n.a.            | n.a. | 113         | 1c | 1a | x | 2   | pos   | pos | neg | A       | 0               | 0   | 1               | 3   | 213         | 1c | 0  | x   | 2   | neg   | pos | neg | B       | 3               | 3   | 2               | 8    |
| 14          | 1c | 0  | x | 2 | neg   | pos | pos | B       | 0               | 0   | 2               | 8    | 114         | 1c | 1b | x | 2   | neg   | pos | pos | A       | 0               | 0   | 3               | 12  | 214         | 2  | 0  | x   | 3   | neg   | neg | neg | A       | 3               | 9   | 2               | 8    |
| 15          | 1c | 1b | x | 2 | neg   | pos | pos | A       | 0               | 0   | 2               | 8    | 115         | 1c | 0  | x | 2   | neg   | pos | pos | A       | 0               | 0   | 0               | 0   | 215         | 1b | 0  | x   | 1   | neg   | pos | pos | A       | 3               | 9   | n.a.            | n.a. |
| 16          | 1c | 0  | x | 3 | neg   | pos | pos | A       | 0               | 0   | 2               | 8    | 116         | 1c | 0  | x | 2   | neg   | pos | pos | A       | 0               | 0   | 0               | 0   | 216         | 2  | 2  | x   | neg | pos   | neg | A   | 3       | 9               | 0   | 0               |      |
| 17          | 1c | x  | x | 2 | neg   | pos | pos | A       | 0               | 0   | n.a.            | n.a. | 117         | 1c | 0  | x | 1   | neg   | pos | pos | A       | 0               | 0   | 2               | 4   | 217         | 1b | 0  | x   | 2   | neg   | pos | neg | B       | 3               | 9   | 1               | 4    |
| 18          | 1c | 0  | x | 2 | neg   | pos | pos | A       | 0               | 0   | 1               | 4    | 118         | 1c | 0  | x | 1   | neg   | pos | neg | A       | 0               | 0   | 1               | 4   | 218         | 1c | 0  | x   | pos | pos   | pos | A   | 3       | 6               | 1   | 3               |      |
| 19          | 1c | 0  | x | 2 | neg   | pos | neg | A       | 0               | 0   | 3               | 12   | 119         | 1b | 0  | x | 1   | neg   | pos | neg | A       | 0               | 0   | 1               | 3   | 219         | 1b | 0  | x   | 2   | neg   | pos | pos | A       | 3               | 9   | n.a.            | n.a. |
| 20          | 2  | 1a | x | 2 | neg   | pos | pos | A       | 2               | 2   | 2               | 8    | 120         | 1c | 0  | x | neg | neg   | neg | A   | 0       | 0               | 2   | 8               | 220 | 1c          | 1b | x  | 2   | neg | pos   | pos | A   | 3       | 6               | 2   | 8               |      |
| 21          | 1b | 0  | x | 2 | neg   | neg | neg | A       | 2               | 4   | 1               | 4    | 121         | 1b | 0  | x | neg | pos   | pos | A   | 0       | 0               | 2   | 8               | 221 | 1c          | 0  | x  | neg | pos | pos   | A   | 3   | 6       | 0               | 0   |                 |      |
| 22          | 1c | 0  | x | 2 | neg   | neg | neg | A       | 2               | 4   | 1               | 4    | 122         | 2  | 0  | x | neg | pos   | neg | B   | 0       | 0               | 3   | 12              | 222 | 1b          | 0  | x  | neg | pos | pos   | A   | 3   | 6       | 2               | 8   |                 |      |
| 23          | 2  | 1b | x | 3 | neg   | pos | neg | A       | 2               | 4   | 2               | 8    | 123         | 1c | 2  | x | neg | pos   | pos | A   | 0       | 0               | 3   | 12              | 224 | 2           | 1b | x  | 2   | neg | pos   | neg | A   | 0       | 0               | 1   | 4               |      |
| 24          | 1c | 1b | x | 2 | neg   | pos | pos | A       | 0               | 0   | n.a.            | n.a. | 124         | 1c | 0  | x | 2   | neg   | neg | neg | A       | 0               | 0   | 2               | 8   | 225         | 1b | 0  | x   | neg | pos   | pos | A   | 3       | 6               | 1   | 3               |      |
| 25          | 1c | 1a | x | 3 | neg   | pos | neg | A       | 0               | 0   | 2               | 8    | 125         | 1c | 0  | x | 2   | neg   | pos | pos | A       | 0               | 0   | 3               | 12  | 226         | 2  | 0  | x   | 2   | neg   | pos | neg | B       | 3               | 3   | 0               | 0    |
| 26          | 1c | 0  | x | 2 | neg   | pos | pos | A       | 0               | 0   | 2               | 8    | 126         | 1c | 1b | x | 2   | pos   | pos | pos | A       | 0               | 0   | 2               | 8   | 227         | 1c | 0  | x   | neg | pos   | pos | B   | 3       | 12              | 2   | 8               |      |
| 27          | 1c | 1a | x | 2 | pos   | pos | pos | A       | 0               | 0   | 3               | 12   | 127         | 2  | 1b | x | neg | pos   | pos | A   | 0       | 0               | 3   | 12              | 228 | 1c          | 1b | x  | neg | pos | pos   | A   | 0   | 0       | 3               | 12  |                 |      |
| 28          | 1c | 1b | x | 2 | neg   | pos | neg | B       | 0               | 0   | 1               | 4    | 128         | 2  | 1c | x | 1   | neg   | pos | pos | A       | 0               | 0   | 1               | 4   | 229         | 1c | 0  | x   | neg | neg   | neg | A   | 3       | 3               | 1   | 4               |      |
| 29          | 1c | 1b | x | 3 | neg   | pos | pos | A       | 0               | 0   | 1               | 3    | 129         | 2  | 0  | x | neg | pos   | pos | B   | 0       | 0               | 1   | 2               | 230 | 2           | 1b | x  | neg | pos | neg   | A   | 0   | 0       | 0               | 0   |                 |      |
| 30          | 1c | 0  | x | 3 | neg   | neg | pos | B       | 2               | 2   | 1               | 4    | 130         | 1b | 0  | x | neg | pos   | pos | A   | 0       | 0               | 2   | 8               | 231 | 1c          | 0  | x  | 3   | neg | neg   | neg | A   | 0       | 0               | 2   | 8               |      |
| 31          | 2  | x  | x | 2 | neg   | pos | pos | A       | 0               | 0   | 0               | 0    | 131         | 1b | 0  | x | neg | pos   | pos | B   | 0       | 0               | 0   | 0               | 232 | 1b          | 0  | x  | neg | pos | pos   | B   | 3   | 6       | 0               | 0   |                 |      |
| 32          | 2  | x  | x | 2 | neg   | pos | neg | A       | 0               | 0   | 1               | 4    | 132         | 1b | 0  | x | neg | pos   | pos | A   | 0       | 0               | 3   | 12              | 233 | 2           | 1b | x  | 3   | pos | neg   | neg | A   | 3       | 6               | 1   | 4               |      |
| 33          | 1c | 0  | x | 2 | neg   | pos | pos | A       | 0               | 0   | 1               | 4    | 133         | 1b | 1a | x | neg | pos   | pos | A   | 0       | 0               | 0   | 0               | 234 | 2           | 1b | x  | 1   | neg | pos   | neg | A   | 0       | 0               | 0   | 0               |      |
| 34          | 1b | 0  | x | 3 | neg   | pos | pos | B       | 1               | 1   | 2               | 8    | 134         | 1b | 0  | x | neg | pos   | pos | A   | 0       | 0               | 1   | 4               | 235 | 1c          | 0  | x  | neg | pos | pos   | A   | 3   | 9       | 2               | 8   |                 |      |
| 35          | 2  | 1b | x | 3 | neg   | pos | pos | A       | 1               | 1   | n.a.            | n.a. | 135         | 1c | 1b | x | neg | neg   | neg | A   | 0       | 0               | 3   | 12              |     |             |    |    |     |     |       |     |     |         |                 |     |                 |      |
| 36          | 1c | 0  | x | 2 | neg   | pos | neg | A       | 0               | 0   | 2               | 4    | 136         | 1c | 1b | x | neg | pos   | pos | A   | 0       | 0               | 3   | 12              |     |             |    |    |     |     |       |     |     |         |                 |     |                 |      |
| 37          | 2  | 0  | x | 2 | neg   | neg | neg | A       | 0               | 0   | 2               | 8    | 137         | 1c | 0  | x | 1   | neg   | pos | pos | A       | 0               | 0   | 1               | 4   |             |    |    |     |     |       |     |     |         |                 |     |                 |      |
| 38          | 2  | 0  | x | 3 | neg   | pos | neg | A       | 0               | 0   | 0               | 0    | 138         | 1b | 1b | x | neg | pos   | pos | A   | 0       | 0               | 3   | 12              |     |             |    |    |     |     |       |     |     |         |                 |     |                 |      |
| 39          | 2  | 0  | x | 3 | neg   | pos | pos | B       | 0               | 0   | 1               | 4    | 139         | 1c | 0  | x | neg | pos   | pos | A   | 0       | 0               | 3   | 12              |     |             |    |    |     |     |       |     |     |         |                 |     |                 |      |
| 40          | 1b | 0  | x | 2 | neg   | pos | pos | B       | 0               | 0   | 2               | 8    | 140         | 1c | 1b | x | 2   | neg   | pos | pos | B       | 0               | 0   | 2               | 6   |             |    |    |     |     |       |     |     |         |                 |     |                 |      |
| 41          | 2  | 1b | x | 3 | pos   | neg | neg | A       | 0               | 0   | 2               | 8    | 141         | 1c | 0  | x | 2   | neg   | pos | pos | A       | 0               | 0   | 1               | 3   |             |    |    |     |     |       |     |     |         |                 |     |                 |      |
| 42          | 2  | 0  | x | 3 | pos   | pos | pos | A       | 0               | 0   | 3               | 12   | 142         | 1c | 0  | x | neg | pos   | pos | A   | 0       | 0               | 2   | 4               |     |             |    |    |     |     |       |     |     |         |                 |     |                 |      |
| 43          | 1c | 1b | x | 3 | neg   | pos | pos | A       | 0               | 0   | n.a.            | n.a. | 143         | 1c | 0  | x | 2   | neg   | pos | pos | B       | 0               | 0   | 0               | 0   |             |    |    |     |     |       |     |     |         |                 |     |                 |      |
| 44          | 1b | 0  | x | 2 | neg   | pos | pos | A       | 0               | 0   | 0               | 0    | 144         | 1b | 0  | x | 2   | neg   | pos | pos | B       | 0               | 0   | 1               | 4   |             |    |    |     |     |       |     |     |         |                 |     |                 |      |
| 45          | 2  | 1b | x | 3 | pos   | pos | pos | A       | 0               | 0   | 2               | 8    | 145         | 1c | 0  | 1 | neg | pos   | pos | B   | 0       | 0               | 3   | 12              |     |             |    |    |     |     |       |     |     |         |                 |     |                 |      |
| 46          | 1c | 0  | x | 3 | neg   | neg | neg | A       | 0               | 0   | 2               | 8    | 146         | 2  | x  | x | 2   | neg   | neg | neg | A       | 0               | 0   | 2               | 2   |             |    |    |     |     |       |     |     |         |                 |     |                 |      |
| 47          | 1c | x  | x | 2 | neg   | pos | pos | A       | 0               | 0   | 1               | 4    | 147         | 1c | 1b | x | neg | pos   | pos | A   | 0       | 0               | 1   | 3               |     |             |    |    |     |     |       |     |     |         |                 |     |                 |      |
| 48          | 1c | 0  | x | 2 | neg   | neg | neg | A       | 0               | 0   | 3               | 12   | 148         | 1c | 0  | x | 1   | pos   | pos | neg | A       | 0               | 0   | 0               | 0   |             |    |    |     |     |       |     |     |         |                 |     |                 |      |
| 49          | 2  | 0  | x | 2 | neg   | pos | pos | A       | 0               | 0   | 2               | 8    | 149         | 2  | 1b | x | 2   | pos   | pos | pos | A       | 0               | 0   | 1               | 3   |             |    |    |     |     |       |     |     |         |                 |     |                 |      |
| 50          | 1c | 0  | x | 3 | neg   | pos | pos | A       | 0               | 0   | 3               | 12   | 150         | 1c | 0  | x | 2   | neg   | neg | neg | A       | 0               | 0   | 1               | 3   |             |    |    |     |     |       |     |     |         |                 |     |                 |      |
| 51          | 2  | x  | x | 2 | neg   | pos | neg | A       | 0               | 0   | 3               | 12   | 151         | 2  | x  | x | 1   | neg   | pos | pos | A       | 0               | 0   | 1               | 4   |             |    |    |     |     |       |     |     |         |                 |     |                 |      |
| 52          | 2  | 0  | x | 3 | neg   | pos | pos | A       | 0               | 0   | 3               | 12   | 152         | 1b | 1b | x | 1   | neg   | pos | pos | B       | 0               | 0   | 0               | 0   |             |    |    |     |     |       |     |     |         |                 |     |                 |      |
| 53          | 1c | 1b | x | 3 | pos   | pos | pos | B       | 0               | 0   | 3               | 12   | 1           |    |    |   |     |       |     |     |         |                 |     |                 |     |             |    |    |     |     |       |     |     |         |                 |     |                 |      |

Western blot showing  $G_i$ - Protein expression of T47D cells after stimulation with Epinephrine

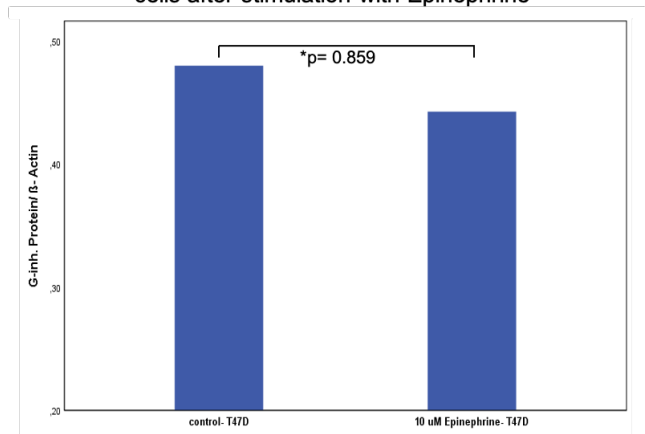

**Figure S1. Western Blot analysis of  $G_i$ - protein expression in T47D cells after stimulation with Epinephrine.** Bar chart of  $G_i$ - protein expression in T47D cells after incubation with 10 $\mu$ M Epinephrine. Epinephrine showed no significant impact on T47D ( $p= 0.859$ ).
